# Supplementary material
Source: PubMed Central journal article supplement (PMC3552884)
Supplement: auto-9-208-s01.pdf [file auto-9-208-s01.pdf]

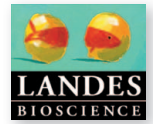

## **Supplemental Material to:**

**Yan Cheng, Xingcong Ren, Yi Zhang, Yu Shan,  
Kathryn J. Huber-Keener, Li Zhang, Scot R. Kimball,  
Harold Harvey, Leonard S. Jefferson and Jin-Ming Yang**

**Integrated regulation of autophagy and apoptosis  
by EEF2K controls cellular fate and modulates the efficacy  
of curcumin and velcade against tumor cells**

**Autophagy 2012; 9(2)**

**<http://dx.doi.org/10.4161/auto.22801>**

**[www.landesbioscience.com/journals/autophagy/article/22482](http://www.landesbioscience.com/journals/autophagy/article/22482)**

Fig. 1

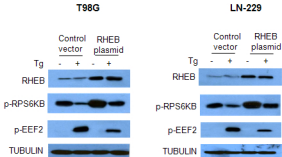

A

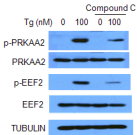

B

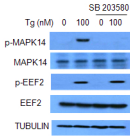



## Legends to Supplementary Figures

**Figure S1. Enforced expression of RHEB decreases the activity of EEF2K in tumor cells subjected to ER stress.** LN-229 or T98G cells were transfected with a control plasmid or a RHEB plasmid, followed by treatment with Tg or vehicle for 24 h. At the end of treatment, the levels of RHEB, p-RPS6KB, and p-EEF2 were examined by western blot. TUBULIN was used as a loading control.

**Figure S2. Effects of the inhibitors of PRKAA2 and MAPK14 on the ER stress-induced activation of EEF2K.** (A) LN-229 cells were treated with Tg for 24 h in the presence or absence of the PRKAA2 inhibitor, Compound C. The levels of p-PRKAA2, PRKAA2, p-EEF2 and EEF2 were examined by western blot. TUBULIN was used as a loading control. (B) LN-229 cells were treated with Tg for 24 h in the presence or absence of the MAPK14 inhibitor, SB203580. The levels of p-MAPK14, MAPK14, p-EEF2 and EEF2 were examined by western blot. TUBULIN was used as a loading control.

**Figure S3. Silencing of DDIT4 expression blocks activation of EEF2K and suppressed autophagy in tumor cells subjected to nutrient starvation.** LN-229 or T98G cells were transfected with a non-targeting RNA or a siRNA targeting *DDIT4*, followed by treatment with PBS for 2 h. The levels of DDIT4, p-EEF2 and LC3 were examined by western blot. TUBULIN was used as a loading control.
